# Supplementary material for: Association of body roundness index and age acceleration with type 2 diabetes: Evident from the UK Biobank
Source: Research Square preprint supplement (doi:10.21203/rs.3.rs-6175507/v1), 2025-03-11
Supplement: Supplementary file 1 [file 2f641ac192fb13e9a3f26bf6.docx]

**Supplemental online Content**

Association of body roundness index and age acceleration with type 2 diabetes：Evident from the UK Biobank

**eFigure1.** Study design and participant flow

**eTable1.** The baseline characteristics of participants grouped by BRI quartile

**eTable2.** The baseline characteristics of participants grouped by ACC quartile


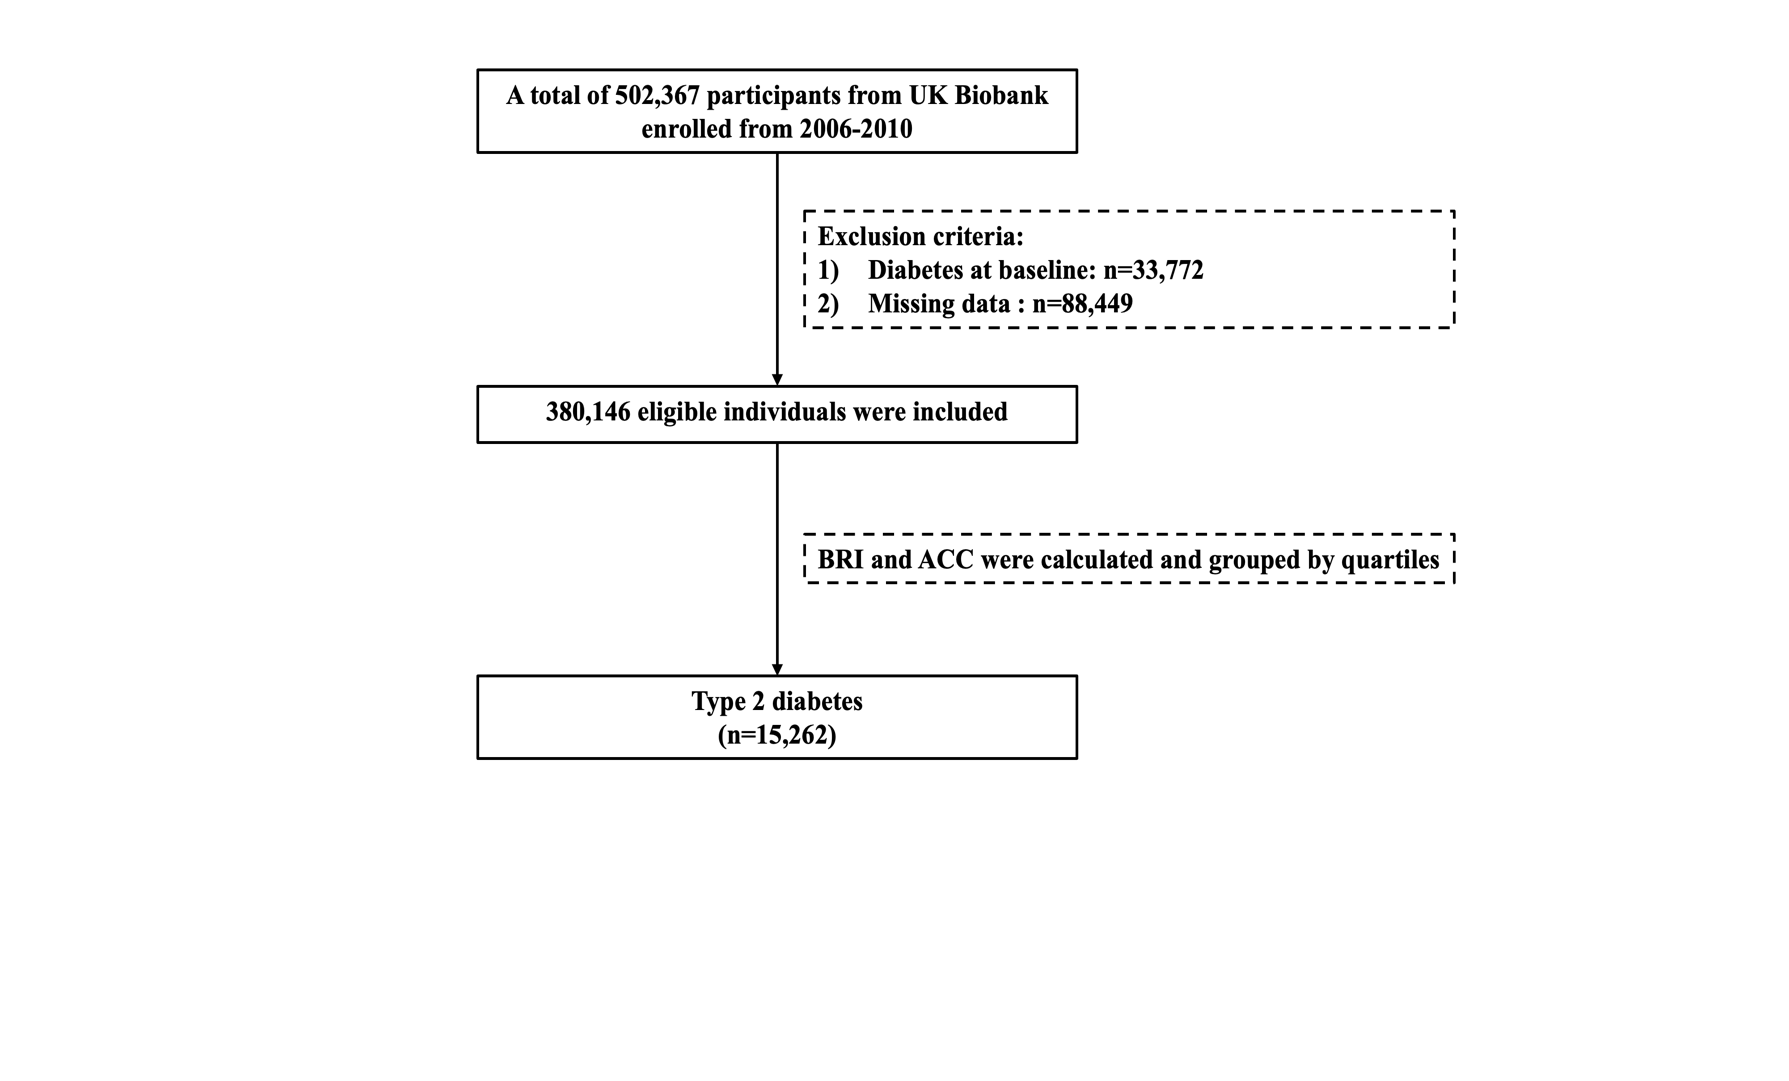


**eFigure 1. Study design and participant flow**

**eTable 1. The baseline characteristics of participants grouped by BRI quartile**

| **Characteristics** | **BRI-Q1**  **(n=94,997)** | **BRI-Q2**  **(n=94,862)** | **BRI-Q3**  **(n=95,451)** | **BRI-Q4**  **(n=94,836)** | **Total**  **(n=380,146)** | **P** |
| --- | --- | --- | --- | --- | --- | --- |
| Sex |  |  |  |  |  | <0.001 |
| Female | 73118(76.97) | 49992(52.70) | 40477(42.41) | 44031(46.43) | 207618 |  |
| Male | 21879(23.03) | 44870(47.30) | 54974(57.59) | 50805(53.57) | 172528 |  |
| BMI |  |  |  |  |  | <0.001 |
| < 18.5 | 2004(2.11) | 21(0.02) | 7(0.01) | 0(0.00) | 2032 |  |
| 18.5 ≤BMI < 24.9 | 78562(82.70) | 37518(39.55) | 7849(8.22) | 446(0.47) | 124375 |  |
| 24.9 ≤BMI < 29.9 | 14292(15.04) | 54985(57.96) | 71367(74.77) | 25329(26.71) | 165973 |  |
| 24.9 ≤BMI | 139(0.15) | 2338(2.46) | 16228(17.00) | 69061(72.82) | 87766 |  |
| Race |  |  |  |  |  | <0.001 |
| Asian or Asian British | 4129(4.36) | 3227(3.42) | 2919(3.08) | 2852(3.03) | 13127 |  |
| Black or Black British | 1554(1.64) | 1513(1.60) | 1578(1.66) | 1543(1.64) | 6188 |  |
| Mixed | 2827(2.99) | 3254(3.45) | 3668(3.87) | 3937(4.18) | 13686 |  |
| White | 86088(91.00) | 86364(91.53) | 86717(91.39) | 85830(91.15) | 344999 |  |
| Education |  |  |  |  |  | <0.001 |
| College or higher | 43765(46.43) | 38345(40.80) | 33862(35.92) | 28199(30.19) | 144171 |  |
| High school | 20876(22.15) | 21866(23.27) | 22792(24.17) | 22535(24.13) | 88069 |  |
| Middle school or lower | 29611(31.42) | 33772(35.93) | 37629(39.91) | 42663(45.68) | 143675 |  |
| Smoking |  |  |  |  |  | <0.001 |
| Never | 58534(61.65) | 54107(57.07) | 49930(52.36) | 46228(48.81) | 208799 |  |
| Previous | 26618(28.03) | 30344(32.01) | 34886(36.59) | 37798(39.91) | 129646 |  |
| Current | 9572(10.08) | 10034(10.58) | 10163(10.66) | 10185(10.75) | 39954 |  |
| Prefer not to answer | 225(0.24) | 316(0.33) | 374(0.39) | 495(0.52) | 1410 |  |
| Drinking |  |  |  |  |  | <0.001 |
| Never | 3613(3.81) | 3427(3.61) | 3654 (3.83) | 4840(5.11) | 15534 |  |
| Previous | 2948(3.10) | 2727(2.88) | 3001 (3.15) | 4029(4.25) | 12705 |  |
| Current | 88299 (93.00) | 88549(93.41) | 88583(92.90) | 85641(90.43) | 351072 |  |
| Prefer not to answer | 89 (0.09) | 97 (0.10) | 115(0.12) | 195(0.21) | 496 |  |
| Hypertensive |  |  |  |  |  | <0.001 |
| No | 12140(12.78) | 18355(19.35) | 24127(25.28) | 29604(31.22) | 84226 |  |
| Yes | 82857(87.22) | 76507(80.65) | 71324(74.72) | 65232(68.78) | 295920 |  |
| Dyslipidemia |  |  |  |  |  | <0.001 |
| No | 6220(6.55) | 11143(11.75) | 14885(15.59) | 17127(18.06) | 49375 |  |
| Yes | 88777(93.45) | 83719(88.25) | 80566(84.41) | 77709(81.94) | 330771 |  |
| Age | 54.36±8.18 | 56.07±8.12 | 57.17±7.96 | 57.79±7.73 | 56.35±8.11 | <0.001 |
| White blood cell | 6.42±1.85 | 6.66±1.93 | 6.90±1.88 | 7.34±1.97 | 6.83±1.94 | <0.001 |
| Red blood cell | 13.44±0.99 | 13.42±0.92 | 13.45±0.92 | 13.59±0.99 | 13.48±0.96 | <0.001 |
| Lymphocyte | 29.19±7.43 | 29.04±7.49 | 28.93±7.47 | 28.76±7.38 | 28.98±7.44 | <0.001 |
| Mean Corpuscular Volume | 83.87±5.34 | 83.06±5.24 | 82.63±5.20 | 82.22±5.19 | 82.94±5.28 | <0.001 |
| Albumin | 45.50±2.60 | 45.40±2.57 | 45.29±2.57 | 44.79±2.59 | 45.24±2.60 | <0.001 |
| Alkaline | 77.25±25.62 | 82.19±25.15 | 84.65±24.98 | 88.57±25.94 | 83.17±25.75 | <0.001 |
| Creatinine | 67.12±13.57 | 72.18±15.22 | 74.69±15.68 | 74.54±16.88 | 72.13±15.69 | <0.001 |
| CRP | 1.49±3.41 | 2.06±3.85 | 2.62±4.21 | 3.94±4.96 | 2.53±4.24 | <0.001 |
| Glucose | 4.84±0.56 | 4.90±0.55 | 4.95±0.56 | 5.02±0.59 | 4.93±0.57 | <0.001 |
| HDL | 1.69±0.39 | 1.49±0.36 | 1.38±0.34 | 1.30±0.31 | 1.46±0.38 | <0.001 |
| LDL | 1.20±0.59 | 1.61±0.86 | 1.92±1.04 | 2.14±1.13 | 1.72±0.99 | <0.001 |
| ACC | -5.53±5.25 | -4.61±5.1 | -3.78±5.14 | -2.2±5.6 | -4.03±5.42 | <0.001 |

Abbreviations: BRI, body roundness index; BMI, body mass index; CRP, C-reactive protein; HDL, high density lipoprotein; LDL, low density lipoprotein; BRI, body roundness index.

BRI is divided into four groups based on the 25th, 50th, and 75th percentiles, labeled as: BRI-Q1, BRI-Q2, BRI-Q3, and BRI-Q4

**eTable 2. The baseline characteristics of participants grouped by ACC quartile**

| **Characteristics** | **ACC-Q1**  **(n=95,036)** | **ACC-Q2**  **(n=95,037)** | **ACC-Q3**  **(n=95,037)** | **ACC-Q4**  **(n=95,036)** | **Total**  **(n=380,146)** | **P** |
| --- | --- | --- | --- | --- | --- | --- |
| Sex |  |  |  |  |  | <0.001 |
| Female | 63354(66.66) | 52608(55.36) | 46982(49.44) | 44674(47.01) | 207618(54.62) |  |
| Male | 31682(33.34) | 42429(44.64) | 48055(50.56) | 50362(52.99) | 172528(45.38) |  |
| BMI |  |  |  |  |  | <0.001 |
| < 18.5 | 787(0.83) | 403(0.42) | 355(0.37) | 487(0.51) | 2032(0.53) |  |
| 18.5 ≤ BMI < 24.9 | 42869(45.11) | 32075(33.75) | 26639(28.03) | 22792(23.98) | 124375(32.72) |  |
| 24.9 ≤BMI < 29.9 | 39425(41.48) | 43621(45.90) | 43315(45.58) | 39612(41.68) | 165973(43.66) |  |
| 24.9 ≤ BMI | 11955(12.58) | 18938(19.93) | 24728(26.02) | 32145(33.82) | 87766(23.09) |  |
| Race |  |  |  |  |  | <0.001 |
| Asian or Asian British | 3687(3.90) | 3288(3.48) | 3200(3.39) | 2952(3.13) | 13127(3.47) |  |
| Black or Black British | 1670(1.77) | 1464(1.55) | 1403(1.48) | 1651(1.75) | 6188(1.64) |  |
| Mixed | 3063(3.24) | 3191(3.38) | 3408(3.61) | 4024(4.26) | 13686(3.62) |  |
| White | 86149(91.10) | 86600(91.60) | 86511(91.52) | 85739(90.86) | 344999(91.27) |  |
| Education |  |  |  |  |  | <0.001 |
| College or higher | 40202(42.71) | 37727(40.10) | 35362(37.63) | 30880(32.95) | 144171(38.35) |  |
| High school | 21024(22.33) | 21936(23.32) | 22396(23.83) | 22713(24.23) | 88069(23.43) |  |
| Middle school or lower | 32906(34.96) | 34409(36.58) | 36223(38.54) | 40137(42.82) | 143675(38.22) |  |
| Smoking |  |  |  |  |  | <0.001 |
| Never | 57020(60.04) | 54620(57.52) | 51547(54.28) | 45612(48.06) | 208799(54.97) |  |
| Previous | 32478(34.20) | 32648(34.38) | 32951(34.70) | 31569(33.26) | 129646(34.13) |  |
| Current | 5176(5.45) | 7401(7.79) | 10084(10.62) | 17293(18.22) | 39954(10.52) |  |
| Prefer not to answer | 299(0.31) | 296(0.31) | 375(0.39) | 440(0.46) | 1410(0.37) |  |
| Drinking |  |  |  |  |  | <0.001 |
| Never | 3503(3.69) | 3509(3.70) | 3845(4.05) | 4677(4.93) | 15534(4.09) |  |
| Previous | 2822(2.97) | 2706(2.85) | 3040(3.20) | 4137(4.36) | 12705(3.35) |  |
| Current | 88555(93.24) | 88665(93.37) | 87963(92.63) | 85889(90.49) | 351072(92.43) |  |
| Prefer not to answer | 93(0.10) | 84(0.09) | 109(0.11) | 210(0.22) | 496(0.13) |  |
| Hypertensive |  |  |  |  |  | <0.001 |
| No | 17492(18.41) | 19453(20.47) | 21548(22.67) | 25733(27.08) | 84226(22.16) |  |
| Yes | 77544(81.59) | 75584(79.53) | 73489(77.33) | 69303(72.92) | 295920(77.84) |  |
| Dyslipidemia |  |  |  |  |  | <0.001 |
| No | 10548(11.10) | 11793(12.41) | 12593(13.25) | 14441(15.20) | 49375(12.99) |  |
| Yes | 84488(88.90) | 83244(87.59) | 82444(86.75) | 80595(84.80) | 330771(87.01) |  |
| Age | 56.07±7.87 | 56.18±8.08 | 56.45±8.16 | 56.70±8.30 | 56.35±8.11 | <0.001 |
| White blood cell | 5.97±1.32 | 6.55±1.45 | 6.99±1.60 | 7.81±2.62 | 6.83±1.94 | <0.001 |
| Red blood cell | 12.85±0.48 | 13.21±0.50 | 13.51±0.56 | 14.33±1.30 | 13.48±0.96 | <0.001 |
| Lymphocyte | 32.28±7.05 | 29.76±6.78 | 28.09±6.80 | 25.79±7.57 | 28.98±7.44 | <0.001 |
| Mean Corpuscular Volume | 81.12±4.52 | 82.49±4.64 | 83.48±4.89 | 84.67±6.22 | 82.94±5.28 | <0.001 |
| Albumin | 46.21±2.46 | 45.54±2.42 | 45.04±2.45 | 44.18±2.62 | 45.24±2.60 | <0.001 |
| Alkaline | 77.48±20.35 | 80.60±21.40 | 83.82±23.19 | 90.78±33.85 | 83.17±25.75 | <0.001 |
| Creatinine | 65.93±11.48 | 70.72±12.70 | 73.87±13.78 | 78.01±20.57 | 72.13±15.69 | <0.001 |
| CRP | 1.14±1.40 | 1.78±2.36 | 2.52±3.39 | 4.67±6.78 | 2.53±4.24 | <0.001 |
| Glucose | 4.74±0.52 | 4.89±0.52 | 4.99±0.55 | 5.11±0.62 | 4.93±0.57 | <0.001 |
| HDL | 1.53±0.38 | 1.47±0.38 | 1.44±0.37 | 1.40±0.38 | 1.46±0.38 | <0.001 |
| LDL | 1.62±0.97 | 1.72±1.00 | 1.76±0.99 | 1.77±1.00 | 1.72±0.99 | <0.001 |
| BRI | 3.57±1.25 | 3.94±1.35 | 4.21±1.46 | 4.59±1.71 | 4.08±1.44 | <0.001 |

Abbreviations: ACC, Age acceleration; BMI, body mass index; BRI, body roundness index; CRP, C-reactive protein; HDL, high density lipoprotein; LDL, low density lipoprotein.

ACC is divided into four groups based on the 25th, 50th, and 75th percentiles, labeled as: ACC-Q1, ACC-Q2, ACC-Q3, and ACC-Q4.
